# Supplementary figures and images for: Association Between Blood Urea Nitrogen to Creatinine Ratio and in-hospital Mortality Among Patients With Acute Myocardial Infarction- A Retrospective Cohort Study
Source: Research Square preprint supplement (doi:10.21203/rs.3.rs-1286247/v1), 2022-02-09

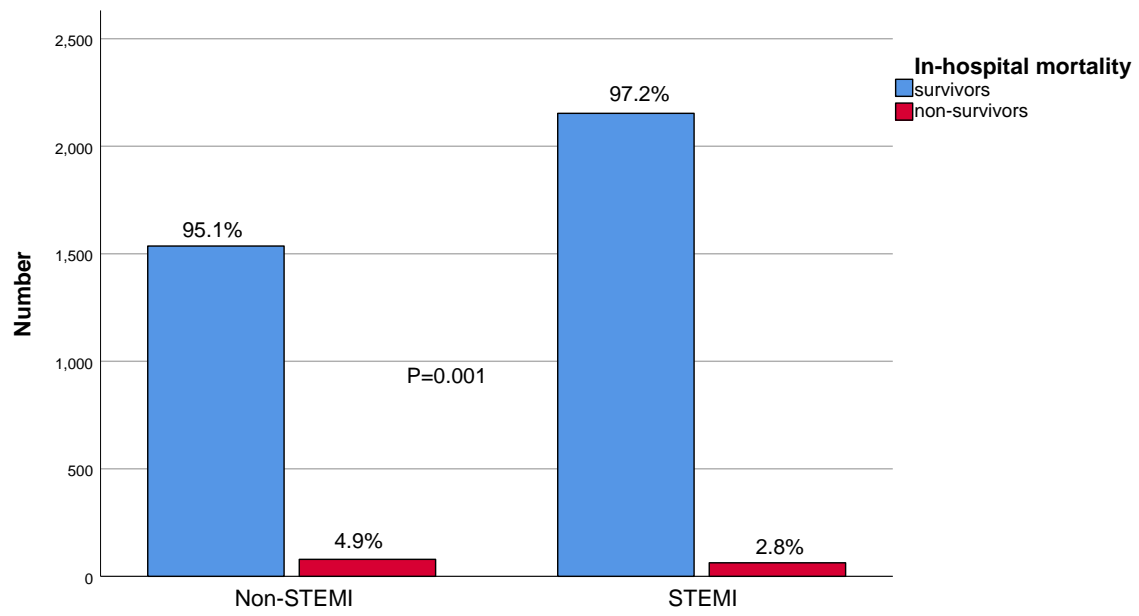

Supplemental figure1 The In-hospital Mortality of the Two Groups

Supplement: Supplementary file 1 [file 43cf7cda944d332a0abd578f.pdf]
